# Supplementary material for: Randomized Cross-Sectional Study to Compare HIV-1 Specific Antibody and Cytokine Concentrations in Female Genital Secretions Obtained by Menstrual Cup and Cervicovaginal Lavage
Source: PubMed Central journal article supplement (PMC4492781; doi:10.1371/journal.pone.0131906), 2015-07-06
Supplement: pone.0131906.s003.pdf [file pone.0131906.s003.pdf]

| PID  | Randop24_rawSC | p66RT_rawSC | gp41_rawSC | gp120_rawSC | TotalIGG_SC | p24_usedSC |
|------|----------------|-------------|------------|-------------|-------------|------------|
| 0001 | *              |             |            |             |             |            |
| 0002 | *              |             |            |             |             |            |
| 0003 | *              |             |            |             |             |            |
| 0004 | *              |             |            |             |             |            |
| 0005 | 130695         | 105645      | 57997,5    | 26895       | 64001,75    | 2,04       |
| 0006 | *              |             |            |             |             |            |
| 0007 | 13755625       | 16840375    | 22081625   | 4859125     | 158051,34   | 87,03      |
| 0008 | 966560000      | 661185000   | 242900000  | 14545875    | 3165662,05  | 305,33     |
| 0009 | 117387500      | 32502500    | 34406250   | 2356600     | 412234,43   | 284,76     |
| 0010 | 87200000       | 113943750   | 219571250  | 32371250    | 2669339,05  | 32,67      |
| 0011 | *              |             |            |             |             |            |
| 0012 | 110678750      | 6212500     | 1401900    | 665650      | 143477,22   | 771,4      |
| 0013 | 11715          | 15975       | 16425      | 50          | 1112,16     | 10,53      |
| 0014 | *              |             |            |             |             |            |
| 0015 | *              |             |            |             |             |            |
| 0016 | 96800000       | 124085000   | 147547500  | 42303750    | 1862013,15  | 51,99      |
| 0017 | *              |             |            |             |             |            |
| 0018 | 104583750      | 7409000     | 6616250    | 5360250     | 2077582,86  | 50,34      |
| 0019 | *              |             |            |             |             |            |
| 0020 | *              |             |            |             |             |            |
| 0021 | 209437500      | 239325000   | 151700000  | 6462750     | 970065,17   | 215,9      |
| 0022 | *              |             |            |             |             |            |
| 0023 | 14584750       | 10812875    | 25240000   | 3313125     | 133911,92   | 108,91     |
| 0024 | *              |             |            |             |             |            |
| 0025 | 85537,5        | 1079925     | 1322062,5  | 380737,5    | 200698,73   | 0,43       |
| 0026 | *              |             |            |             |             |            |
| 0027 | 488302,5       | 2899675     | 5184800    | 318862,5    | 62978,69    | 7,75       |
| 0028 | *              |             |            |             |             |            |
| 0029 | *              |             |            |             |             |            |
| 0030 | *              |             |            |             |             |            |
| 0031 | 462842500      | 68512500    | 32931250   | 2410000     | 330105,8    | 1402,1     |
| 0032 | *              |             |            |             |             |            |
| 0033 | 128672500      | 42422500    | 7651000    | 300850      | 559799,92   | 229,85     |
| 0034 | 376125000      | 75312500    | 7663350    | 5392850     | 147007,56   | 2558,54    |
| 0035 | 38881250       | 184543750   | 176833750  | 11665000    | 2237939,77  | 17,37      |
| 0036 | *              |             |            |             |             |            |
| 0037 | 416742500      | 105642500   | 27097500   | 6546750     | 2470194,75  | 168,71     |
| 0038 | 21156250       | 3868400     | 6980000    | 181500      | 211875,14   | 99,85      |
| 0039 | *              |             |            |             |             |            |

SC= SoftCup or Menstrual Cup Fluid

CVL= Cervicovaginal Lavage

\* = Randomized CVL

| p66_usedSC | gp41_usedSC | gp120_usedSC | p24_rawCVL | p66RT_rawCVL | gp41MN_rawCVL |
|------------|-------------|--------------|------------|--------------|---------------|
|            |             |              | 7496,1     | 3536,1       | 1820,1        |
|            |             |              | 50         | 5951,1       | 1776,6        |
|            |             |              | 50         | 1170         | 4140,9        |
|            |             |              | 944525     | 277930       | 33087         |
| 1,651      | 0,906       | 0,4202       | 37967,1    | 28518,6      | 19535,1       |
|            |             |              | 2080,5     | 24827,4      | 18003         |
| 106,55     | 139,712     | 30,744       | 50103,6    | 103503       | 112898        |
| 208,862    | 76,73       | 4,5949       | 2446450    | 1911500      | 722600        |
| 78,845     | 83,463      | 5,7167       | 160710     | 37516,5      | 50384,4       |
| 42,686     | 82,257      | 12,1271      | 142007     | 183150       | 241720        |
|            |             |              | 50         | 50           | 50            |
| 43,3       | 9,771       | 4,6394       | 1246130    | 86210        | 24420,9       |
| 14,364     | 14,769      | 0,0022       | 50         | 2878,5       | 2684,4        |
|            |             |              | 50         | 21129        | 20363,1       |
|            |             |              | 50         | 110820       | 88385         |
| 66,64      | 79,241      | 22,7194      | 182860     | 243505       | 243127        |
|            |             |              | 4586,4     | 157598       | 67720         |
| 3,566      | 3,185       | 2,58         | 11208      | 691,5        | 468           |
|            |             |              | 781315     | 397480       | 257666        |
|            |             |              | 47080      | 1100165      | 1134190       |
| 246,71     | 156,381     | 6,6622       | 37795,5    | 43968,9      | 19972,5       |
|            |             |              | 30910,5    | 237368       | 234908        |
| 80,746     | 188,482     | 24,7411      |            |              |               |
|            |             |              | 63440      | 80650        | 155242        |
| 5,381      | 6,587       | 1,8971       | 50         | 1317         | 555,9         |
|            |             |              | 16490,4    | 16865,4      | 11535,9       |
| 46,042     | 82,326      | 5,063        | 50         | 2466         | 4795,5        |
|            |             |              | 50         | 50           | 50            |
|            |             |              | 2464080    | 1392830      | 282680        |
|            |             |              | 18282,6    | 192563       | 219873        |
| 207,547    | 99,76       | 7,3007       | 2421570    | 1645170      | 608920        |
|            |             |              | 2139530    | 256574       | 107294        |
| 75,782     | 13,667      | 0,5374       | 403626     | 137766       | 47034,6       |
| 512,304    | 52,129      | 36,6842      | 1916200    | 276584       | 31785,9       |
| 82,461     | 79,016      | 5,2124       | 53995,5    | 234425       | 237632        |
|            |             |              | 12586      | 2184350      | 2397050       |
| 42,767     | 10,97       | 2,6503       | 894350     | 178884       | 42284         |
| 18,258     | 32,944      | 0,8566       | 2835       | 615,9        | 576           |
|            |             |              | 50         | 50           | 50            |

| <b>gp120C_rawCVL</b> | <b>TotalIGG_CVL</b> | <b>p24_usedCVL</b> | <b>p66_usedCVL</b> | <b>gp41_usedCVL</b> |
|----------------------|---------------------|--------------------|--------------------|---------------------|
| 537,6                | 20772               | 0,361              | 0,1702             | 0,0876              |
| 888,6                | 4690,68             | 0,004              | 1,2687             | 0,3788              |
| 305,4                | 7725,38             | 0,004              | 0,1514             | 0,536               |
| 23391                | 36955,09            | 25,559             | 7,5208             | 0,8953              |
| 8134,5               | 986,99              | 38,468             | 28,8945            | 19,7926             |
| 2112                 | 16147,32            | 0,129              | 1,5376             | 1,1149              |
| 23563,5              | 8530,15             | 5,874              | 12,1338            | 13,2352             |
| 53728,5              | 147666,91           | 16,567             | 12,9447            | 4,8934              |
| 5538,9               | 4902,2              | 32,783             | 7,653              | 10,2779             |
| 54052,5              | 42984,98            | 3,304              | 4,2608             | 5,6234              |
| 50                   | 0                   | 0,004              | 0,0043             | 0,0018              |
| 13842,9              | 27751,24            | 44,904             | 3,1065             | 0,88                |
| 50                   | 1006,04             | 0,004              | 2,8612             | 2,6683              |
| 2022                 | 16242,16            | 0,004              | 1,3009             | 1,2537              |
| 5010                 | 60819,4             | 0,004              | 1,8221             | 1,4532              |
| 161345               | 124765,83           | 1,466              | 1,9517             | 1,9487              |
| 12730                | 129315,33           | 0,035              | 1,2187             | 0,5237              |
| 561                  | 1685,29             | 6,65               | 0,4103             | 0,2777              |
| 11292                | 90959,1             | 8,59               | 4,3699             | 2,8328              |
| 37004,4              | 123446,55           | 0,381              | 8,9121             | 9,1877              |
| 1632                 | 13901,07            | 2,719              | 3,163              | 1,4368              |
| 14182,5              | 97152,61            | 0,318              | 2,4432             | 2,4179              |
| 19669,5              | 91994,54            | 0,69               | 0,8767             | 1,6875              |
| 50                   | 2506,1              | 0,004              | 0,5255             | 0,2218              |
| 1160,4               | 31801,96            | 0,519              | 0,5303             | 0,3627              |
| 50                   | 12611,42            | 0,004              | 0,1955             | 0,3803              |
| 50                   | 1258,5              | 0,004              | 0,0043             | 0,0018              |
| 29193,9              | 145966,37           | 16,881             | 9,5421             | 1,9366              |
| 82083                | 138898,24           | 0,132              | 1,3864             | 1,583               |
| 92255                | 121352,02           | 19,955             | 13,557             | 5,0178              |
| 20634,9              | 46676,92            | 45,837             | 5,4968             | 2,2987              |
| 2136,6               | 44913,21            | 8,987              | 3,0674             | 1,0472              |
| 23718,9              | 12450,1             | 153,91             | 22,2154            | 2,5531              |
| 24919,5              | 174857,59           | 0,309              | 1,3407             | 1,359               |
| 38759,4              | 158309,09           | 0,08               | 13,798             | 15,1416             |
| 10922,1              | 85990,01            | 10,401             | 2,0803             | 0,4917              |
| 50                   | 2003,52             | 1,415              | 0,3074             | 0,2875              |
| 50                   | 12672,45            | 0,004              | 0,0043             | 0,0018              |

| gp120_usedCVL | IL_1b_CVL | IL_1ra_CVL | IL_2_CVL | IL_4_CVL | IL_5_CVL | IL_6_CVL | IL_7_CVL |
|---------------|-----------|------------|----------|----------|----------|----------|----------|
| 0,02588       | 10,33     | 9898,97    | 5,82     | 0,075    | 0,47     | 0,73     | 0,03     |
| 0,18944       | 21,33     | 1596,81    | 0,04     | 0,075    | 0,0001   | 0,89     | 0,16     |
| 0,03953       | 4,46      | 2792,4     | 0,04     | 0,075    | 0,0001   | 0,65     | 0,03     |
| 0,63296       | 5,61      | 444,72     | 0,04     | 0,075    | 0,0001   | 0,25     | 0,27     |
| 8,24172       | 28,69     | 5620,28    | 6,5      | 0,075    | 0,0001   | 0,97     | 1,1      |
| 0,1308        | 8,45      | 10018      | 0,04     | 0,075    | 0,15     | 0,49     | 0,79     |
| 2,76238       | 8,78      | 8811,29    | 5,82     | 0,075    | 0,15     | 0,65     | 0,59     |
| 0,36385       | 10,21     | 10598,05   | 0,04     | 0,42     | 0,14     | 7,04     | 1,06     |
| 1,12988       | 31,67     | 2043,11    | 0,04     | 0,36     | 0,1      | 0,58     | 0,6      |
| 1,25747       | 84,12     | 14646,54   | 2,73     | 0,075    | 0,47     | 0,81     | 0,59     |
| 0,00218       | 0,47      | 84,69      | 0,04     | 0,075    | 0,0001   | 0,41     | 0,03     |
| 0,49882       | 61,09     | 12299,99   | 5,99     | 0,31     | 0,15     | 0,93     | 0,95     |
| 0,00218       | 2,21      | 163,69     | 0,04     | 0,21     | 0,06     | 0,19     | 1,32     |
| 0,12449       | 10,06     | 5389,29    | 2,13     | 0,075    | 0,0001   | 0,49     | 0,48     |
| 0,08238       | 1,47      | 2049,02    | 1,72     | 0,075    | 0,0001   | 0,81     | 0,27     |
| 1,29318       | 158,14    | 20811,22   | 8,65     | 0,42     | 0,85     | 102,94   | 2,01     |
| 0,09844       | 72,78     | 18622,34   | 0,04     | 0,62     | 1,48     | 1,54     | 1,86     |
| 0,33288       | 10,48     | 2731,6     | 6,16     | 0,075    | 0,56     | 1,05     | 0,38     |
| 0,12414       | 712,94    | 11802,32   | 8,08     | 1,31     | 0,94     | 31,53    | 10,42    |
| 0,29976       | 2,56      | 1588,6     | 4,5      | 0,075    | 0,0001   | 0,49     | 0,03     |
| 0,1174        | 9,47      | 628,45     | 4,48     | 1,93     | 0,41     | 1,2      | 1,52     |
| 0,14598       | 113,1     | 32918,16   | 4,5      | 1,47     | 2,07     | 60,55    | 6,89     |
| 0,21381       | 15,74     | 5957,02    | 0,04     | 0,075    | 0,0001   | 0,65     | 0,79     |
| 0,00218       | 27,77     | 605,39     | 0,04     | 0,33     | 0,06     | 1,16     | 0,39     |
| 0,03649       | 412,67    | 14561,51   | 3,02     | 0,67     | 1,21     | 6,48     | 1,91     |
| 0,00218       | 5,29      | 10985,31   | 4,05     | 0,075    | 0,0001   | 1,18     | 1,15     |
| 0,00218       | 28,29     | 175,8      | 1,51     | 0,075    | 0,0001   | 0,41     | 0,03     |
| 0,2           | 1,3       | 171,98     | 0,04     | 0,075    | 0,0001   | 0,73     | 0,64     |
| 0,59096       | 1510,69   | 20034,8    | 3,21     | 0,71     | 0,26     | 9,76     | 1,91     |
| 0,76023       | 94,85     | 25543,73   | 0,23     | 0,76     | 0,17     | 3,94     | 2,32     |
| 0,44208       | 136,5     | 3285,5     | 0,04     | 0,075    | 0,0001   | 3,56     | 0,69     |
| 0,04757       | 0,17      | 651,87     | 0,08     | 0,55     | 0,0001   | 0,32     | 0,17     |
| 1,90512       | 14,34     | 6032,1     | 0,04     | 0,33     | 0,1      | 1,3      | 1,32     |
| 0,14251       | 734,71    | 4593,55    | 3,22     | 1,43     | 0,24     | 60,27    | 2,86     |
| 0,24483       | 623,96    | 24992,72   | 0,04     | 0,46     | 0,76     | 2,34     | 3,05     |
| 0,12702       | 6,32      | 25631,86   | 0,04     | 0,76     | 0,14     | 3,42     | 1,82     |
| 0,00218       | 0,41      | 1421,82    | 6,24     | 0,075    | 0,26     | 0,49     | 0,22     |
| 0,00218       | 479,52    | 12811,05   | 3,21     | 0,5      | 0,15     | 5,75     | 1        |

| IL_8_CVL | IL_9_CVL | IL_10_CVL | IL_12p70_CVL | IL_13_CVL | IL_15_CVL | IL_17_CVL | Eotaxin_CVL |
|----------|----------|-----------|--------------|-----------|-----------|-----------|-------------|
| 9,07     | 0,74     | 14,66     | 9,33         | 0,085     | 16,53     | 21,31     | 0,205       |
| 4,19     | 0,89     | 6,42      | 16,58        | 0,085     | 6,35      | 14,12     | 0,205       |
| 24,41    | 0,27     | 8,14      | 2,14         | 0,085     | 12,23     | 12,75     | 0,205       |
| 62,7     | 0,27     | 3,74      | 9,33         | 0,085     | 8,97      | 17,74     | 0,205       |
| 33,39    | 1,91     | 12,09     | 13,51        | 0,085     | 17,86     | 18,64     | 0,205       |
| 10,8     | 1,28     | 13,7      | 28,1         | 0,085     | 0,0001    | 11,37     | 0,205       |
| 20,97    | 2,14     | 15,31     | 43,1         | 0,085     | 12,79     | 21,31     | 0,205       |
| 261,08   | 1,47     | 2,77      | 7,42         | 2,21      | 0,08      | 4,42      | 2,44        |
| 136,15   | 0,54     | 1,77      | 5,63         | 0,55      | 0,52      | 3,17      | 0,41        |
| 67,85    | 2,14     | 14,82     | 20,17        | 0,68      | 8,18      | 25,72     | 0,205       |
| 0,22     | 0,27     | 3,06      | 0,275        | 0,085     | 0,0001    | 10,44     | 0,205       |
| 72,84    | 2,99     | 15,63     | 36,73        | 0,085     | 17,51     | 22,2      | 0,205       |
| 10,08    | 1,2      | 4,4       | 46,49        | 3,55      | 0,56      | 3,37      | 0,205       |
| 122,2    | 1,09     | 10,82     | 24,05        | 0,085     | 11,48     | 13,21     | 0,205       |
| 3,84     | 1,18     | 8,76      | 64,12        | 0,085     | 3,37      | 0,165     | 0,205       |
| 160,75   | 3,5      | 20,03     | 47,23        | 0,8       | 17,55     | 58,49     | 12,15       |
| 19,76    | 2,43     | 18,88     | 45,16        | 0,68      | 3,64      | 23,08     | 0,205       |
| 300,22   | 2,9      | 8,84      | 12,34        | 0,085     | 19,57     | 26,16     | 0,205       |
| 12569,29 | 10,4     | 28,29     | 100,14       | 4,63      | 9,41      | 73,78     | 7,95        |
| 12,87    | 0,27     | 9,55      | 76,89        | 0,085     | 15,86     | 9,51      | 0,205       |
| 1145,86  | 5,93     | 2,31      | 7,6          | 0,78      | 1,62      | 117,61    | 34,17       |
| 3793,29  | 8,62     | 27,79     | 87,99        | 4,63      | 2,79      | 47,18     | 0,205       |
| 56,25    | 1,09     | 11,46     | 69,38        | 0,085     | 4,55      | 10,44     | 0,205       |
| 26,76    | 1,01     | 1,33      | 3,26         | 0,31      | 0,31      | 5,3       | 0,205       |
| 253,46   | 4,65     | 21,26     | 46,19        | 0,8       | 3,64      | 29,22     | 0,205       |
| 32,7     | 3,36     | 12,49     | 9,1          | 0,085     | 16,25     | 19,53     | 0,205       |
| 26,65    | 1,09     | 3,96      | 2,47         | 0,085     | 16,06     | 15,94     | 0,205       |
| 3,75     | 1,48     | 3,36      | 9,33         | 0,085     | 15,78     | 70,08     | 6,24        |
| 1234,77  | 5,02     | 20,85     | 75,93        | 0,8       | 0,0001    | 53,9      | 0,205       |
| 118,83   | 3,73     | 7,27      | 70,53        | 4,29      | 0,41      | 8,29      | 8,08        |
| 252,59   | 1,48     | 7,98      | 9,67         | 0,085     | 6,35      | 19,53     | 0,205       |
| 1,42     | 1,6      | 0,93      | 2,37         | 0,085     | 1,57      | 83,41     | 22,23       |
| 144,92   | 1,2      | 3,38      | 17,5         | 2,12      | 0,95      | 3,57      | 0,205       |
| 7101,37  | 3,26     | 5,45      | 44,75        | 3,14      | 1,44      | 56,55     | 30,79       |
| 8190,34  | 11,06    | 30,3      | 159,92       | 2,05      | 0,0001    | 35,7      | 0,205       |
| 690,29   | 2,89     | 3,89      | 23,8         | 2,34      | 0,84      | 9,96      | 4,36        |
| 1,17     | 0,27     | 7,2       | 3,02         | 0,085     | 19,27     | 24,85     | 0,205       |
| 1089,47  | 4,38     | 19,05     | 74,15        | 0,74      | 10,21     | 27,91     | 0,205       |

| FGFbasic_CVL | G_CSF_CVL | GM_CSF_CVL | IFN_g_CVL | IP_10_CVL | MCP_1_CVL | MIP_1a_CVL |
|--------------|-----------|------------|-----------|-----------|-----------|------------|
| 15,2         | 36,12     | 106,48     | 1,815     | 0,42      | 7,14      | 0,62       |
| 10,07        | 1,71      | 101,49     | 1,815     | 0,42      | 6,74      | 0,62       |
| 13,53        | 1,71      | 107,33     | 1,815     | 13,61     | 5,82      | 0,45       |
| 24,55        | 45,59     | 106,22     | 1,815     | 389,57    | 5,3       | 0,33       |
| 15,61        | 52,84     | 106,13     | 6,6       | 102,22    | 11,1      | 0,87       |
| 13,09        | 1,71      | 106,82     | 7,96      | 17,41     | 6,13      | 0,27       |
| 14,79        | 51,05     | 117,3      | 1,815     | 129,43    | 8,5       | 0,49       |
| 6,36         | 80,99     | 24,33      | 21,11     | 635,53    | 12,99     | 0,33       |
| 8,04         | 5,62      | 30,65      | 11,61     | 176,47    | 4,54      | 0,24       |
| 21,19        | 1,71      | 117,81     | 5,91      | 213,31    | 13,83     | 1,12       |
| 11,51        | 1,71      | 92,96      | 1,815     | 0,42      | 4,87      | 0,22       |
| 19,42        | 105,45    | 125,88     | 6,6       | 826,36    | 6,64      | 0,97       |
| 3,29         | 7,8       | 30,65      | 3,63      | 18,38     | 5,75      | 0,14       |
| 18,32        | 1,71      | 110,26     | 1,815     | 1094,63   | 6,64      | 0,41       |
| 17,94        | 1,71      | 119,02     | 5,2       | 0,42      | 6,03      | 0,005      |
| 19,42        | 2772,15   | 125,8      | 25,47     | 2031,7    | 81,93     | 1,87       |
| 19,05        | 66,74     | 95,29      | 15,56     | 35,22     | 7,68      | 1,3        |
| 25,2         | 1,71      | 117,64     | 5,91      | 800,35    | 10        | 0,59       |
| 45,81        | 18500,55  | 111,37     | 55,54     | 8565,57   | 40,4      | 31,98      |
| 15           | 1,71      | 126,65     | 1,815     | 154,29    | 7,09      | 0,005      |
| 64,24        | 32,88     | 36,48      | 130,44    | 99,98     | 6,37      | 1,86       |
| 28,92        | 2778      | 114,72     | 34,82     | 4004,09   | 35,95     | 2,11       |
| 13,09        | 1,71      | 94,25      | 1,815     | 313,63    | 7,14      | 0,49       |
| 8,04         | 28,78     | 30,99      | 7,69      | 99,18     | 4,68      | 0,22       |
| 20,84        | 498,13    | 97,01      | 21,47     | 23,43     | 7,73      | 3,34       |
| 19,78        | 1,71      | 120,9      | 1,815     | 132,21    | 49,23     | 0,33       |
| 21,54        | 1,71      | 109,74     | 1,815     | 0,42      | 5,61      | 0,74       |
| 29,22        | 1,71      | 117,56     | 1,815     | 12,12     | 24,16     | 0,77       |
| 32,57        | 3892,2    | 94,77      | 48,45     | 5670      | 21,21     | 2,42       |
| 12,87        | 553,73    | 36,14      | 26,67     | 1162,5    | 4,97      | 0,4        |
| 23,57        | 425,27    | 95,81      | 9,28      | 279,82    | 15,57     | 1,47       |
| 36,82        | 6,71      | 35,69      | 11,61     | 48,33     | 4,09      | 0,94       |
| 4,94         | 64,13     | 32,89      | 11,61     | 336,94    | 12,96     | 0,2        |
| 35,33        | 615,28    | 31,54      | 100,19    | 3477,27   | 15,37     | 1,58       |
| 23,57        | 182,58    | 109,48     | 26,03     | 5967,89   | 15,11     | 2,26       |
| 9,58         | 128,91    | 36,48      | 26,67     | 3722,08   | 12,17     | 0,29       |
| 15,2         | 1,71      | 120,9      | 5,91      | 57,91     | 8,31      | 0,49       |
| 23,4         | 458,59    | 114,21     | 22,63     | 390,78    | 12,74     | 2,69       |

| PDGF_bb_CVL | MIP_1b_CVL | RANTES_CVL | TNF_a_CVL | VEGF_CVL | IL_1a_CVL | IL_2Ra_CVL |
|-------------|------------|------------|-----------|----------|-----------|------------|
| 2,03        | 3,25       | 6,57       | 0,625     | 122,67   | 326,15    | 21,2       |
| 3,84        | 3,86       | 0,425      | 0,625     | 201,83   | 485,21    | 39,55      |
| 0,22        | 2,23       | 5,74       | 0,625     | 25,61    | 17,94     | 43,87      |
| 4,48        | 5,57       | 0,425      | 0,625     | 141,82   | 28,51     | 21,2       |
| 3,84        | 5,37       | 5,74       | 0,625     | 139,69   | 121,87    | 25,99      |
| 0,22        | 7,87       | 0,425      | 0,625     | 302,89   | 444,53    | 25,99      |
| 0,22        | 3          | 7,15       | 0,625     | 444,78   | 193,66    | 21,2       |
| 2,33        | 19,71      | 6,39       | 2,98      | 136,57   | 13,1      | 35,62      |
| 2,97        | 4,54       | 0,425      | 2,45      | 137,26   | 19,72     | 17,23      |
| 5,74        | 11,99      | 0,425      | 0,625     | 265,72   | 571,12    | 52,3       |
| 0,22        | 1,32       | 0,425      | 0,625     | 10,74    | 1,38      | 25,99      |
| 2,53        | 14,32      | 5,3        | 0,625     | 410      | 42,33     | 16,2       |
| 2,97        | 3,64       | 0,425      | 1,59      | 881,39   | 31,63     | 30,77      |
| 14,12       | 4,37       | 4,58       | 0,625     | 259,24   | 53,22     | 21,2       |
| 0,22        | 1,85       | 3,17       | 0,625     | 780,5    | 26,44     | 56,42      |
| 4,32        | 45,99      | 16,32      | 0,625     | 502,77   | 137,63    | 99,02      |
| 2,03        | 5,47       | 5,53       | 5,79      | 661,4    | 249,21    | 25,99      |
| 0,22        | 4,96       | 7,7        | 0,625     | 167,6    | 10,62     | 21,2       |
| 20,43       | 446,37     | 35,89      | 38,03     | 1694,62  | 364,52    | 56,42      |
| 0,22        | 1,41       | 4,58       | 0,625     | 1105,25  | 37,13     | 48,12      |
| 7,51        | 7,58       | 5,18       | 9,14      | 68,9     | 42,76     | 21,09      |
| 26,73       | 59,48      | 27,52      | 14,06     | 1617,74  | 155,34    | 72,42      |
| 0,22        | 2,93       | 0,425      | 0,625     | 934,88   | 85,14     | 16,2       |
| 1,06        | 26,59      | 0,425      | 1,76      | 84,85    | 6,59      | 23,02      |
| 12,37       | 10,52      | 8,39       | 12,96     | 440,29   | 156,16    | 48,12      |
| 6,05        | 5,67       | 7,34       | 0,625     | 94,07    | 71,54     | 25,99      |
| 0,22        | 3,74       | 6,57       | 0,625     | 29,75    | 39,11     | 21,2       |
| 0,22        | 1,85       | 8,22       | 0,625     | 187,83   | 8,76      | 30,62      |
| 35,92       | 37,67      | 79,26      | 14,61     | 1864,11  | 1868,72   | 87,8       |
| 10,14       | 81,59      | 0,425      | 2,63      | 1275,07  | 51,03     | 32,71      |
| 4,48        | 12,71      | 0,425      | 0,625     | 157,12   | 531,37    | 30,62      |
| 1,53        | 2,81       | 2,72       | 2,98      | 73,29    | 10,66     | 38,54      |
| 8,17        | 5,72       | 0,425      | 2,63      | 285,55   | 86,1      | 42,43      |
| 19,77       | 6,17       | 7,78       | 12,01     | 3052,8   | 863,42    | 83,48      |
| 28,8        | 20,86      | 16,32      | 10,21     | 6408,26  | 1863,92   | 62,5       |
| 8,82        | 11,67      | 10,87      | 2,27      | 430,23   | 15,14     | 59,98      |
| 0,22        | 2,73       | 8,05       | 0,625     | 27,43    | 5,43      | 35,14      |
| 27,15       | 26,21      | 9,68       | 9,11      | 820,96   | 196,46    | 62,5       |

| IL_3_CVL | IL_12p40_CVL | IL_16_CVL | IL_18_CVL | CTACK_CVL | GROa_CVL | HGF_CVL |
|----------|--------------|-----------|-----------|-----------|----------|---------|
| 62,37    | 270,44       | 12,24     | 14,63     | 30,05     | 24,76    | 12,97   |
| 120,04   | 446,89       | 46,96     | 1078,78   | 48,29     | 50,7     | 81,19   |
| 115,79   | 435,36       | 46,96     | 1240,17   | 45,6      | 51,32    | 32,1    |
| 67,96    | 324,86       | 3,54      | 3,41      | 30,05     | 37,55    | 12,97   |
| 73,35    | 381,8        | 26,96     | 320,05    | 30,05     | 115,41   | 45,44   |
| 93,32    | 160,92       | 37,76     | 628,91    | 42,81     | 36,35    | 29,82   |
| 73,35    | 356,97       | 17,98     | 190,01    | 30,05     | 41,69    | 17,99   |
| 95,09    | 89,19        | 75,58     | 89,04     | 14,52     | 381,57   | 153,12  |
| 88,31    | 319,8        | 27,1      | 113,85    | 17,41     | 502,05   | 26,85   |
| 107,06   | 502,79       | 48,39     | 1397,26   | 36,81     | 50,7     | 93,36   |
| 73,35    | 324,86       | 3,54      | 3,19      | 36,81     | 24,76    | 9,01    |
| 73,35    | 337,86       | 12,24     | 217,56    | 22,03     | 35,95    | 36,61   |
| 114,91   | 89,19        | 66,08     | 1054,65   | 14,52     | 323,22   | 43,48   |
| 67,96    | 284,45       | 12,24     | 19,37     | 30,05     | 34,29    | 25,18   |
| 115,79   | 387,9        | 17,98     | 19,73     | 87,97     | 28,88    | 45,44   |
| 191,31   | 627,7        | 105,32    | 4729      | 58,14     | 88,85    | 299,88  |
| 73,35    | 241,43       | 3,54      | 91,71     | 36,81     | 37,15    | 27,51   |
| 83,61    | 324,86       | 12,24     | 7,36      | 36,81     | 3277,59  | 15,51   |
| 107,06   | 350,65       | 162,72    | 50,28     | 55,79     | 6588,12  | 3062,17 |
| 102,58   | 435,36       | 37,76     | 3,19      | 42,81     | 43,47    | 29,82   |
| 62,95    | 82,45        | 44,01     | 110,53    | 11,43     | 524,28   | 26,85   |
| 126,29   | 607,64       | 78,72     | 1620,42   | 55,79     | 11261,77 | 181,14  |
| 78,56    | 311,64       | 12,24     | 114,05    | 26,25     | 39,09    | 22,82   |
| 54,08    | 54,06        | 48,67     | 11        | 8,04      | 331,71   | 28,79   |
| 115,79   | 405,97       | 46,96     | 1572,54   | 48,29     | 58,89    | 289,72  |
| 83,61    | 363,24       | 3,54      | 82,3      | 33,55     | 139,15   | 10,36   |
| 78,56    | 363,24       | 3,54      | 33,64     | 30,05     | 24,76    | 27,51   |
| 100,3    | 356,97       | 26,96     | 10,49     | 36,81     | 44,16    | 20,42   |
| 172,12   | 789,18       | 104,4     | 3829,46   | 60,42     | 838,86   | 5116,38 |
| 125,21   | 118,02       | 61,88     | 855,96    | 13,77     | 363,11   | 169,45  |
| 73,35    | 337,86       | 28,93     | 134,18    | 36,81     | 515,04   | 501,23  |
| 70,17    | 70,71        | 64,69     | 12,79     | 16,7      | 341,22   | 14,95   |
| 140,37   | 155,7        | 70,2      | 697,34    | 26,58     | 393,99   | 81,77   |
| 216,79   | 186,78       | 93,54     | 2153      | 32,53     | 669,1    | 817,94  |
| 128,34   | 513,66       | 52,53     | 1465,16   | 50,87     | 865,04   | 420,6   |
| 160,1    | 155,7        | 75,58     | 2186,04   | 26,58     | 449,8    | 95,06   |
| 78,56    | 350,65       | 20,45     | 6,14      | 36,81     | 26,88    | 10,36   |
| 155,67   | 657,33       | 82,95     | 2502,28   | 42,81     | 456,45   | 771,2   |



| IFN_a2_CVL | LIF_CVL | MCP_3_CVL | M_CSF_CVL | MIF_CVL   | MIG_CVL  | b_NGF_CVL | SCF_CVL |
|------------|---------|-----------|-----------|-----------|----------|-----------|---------|
| 18,19      | 15,68   | 8,67      | 75,51     | 68,28     | 38,75    | 0,03      | 0,045   |
| 48,2       | 22,07   | 29,78     | 323,01    | 12564,35  | 67,23    | 0,6       | 9,45    |
| 44         | 15,68   | 53,34     | 16,84     | 68,28     | 77,32    | 1,2       | 8,78    |
| 18,19      | 9,02    | 8,67      | 25,76     | 32,77     | 1196,96  | 0,39      | 3,2     |
| 18,19      | 16,49   | 8,67      | 96,94     | 82,78     | 208,51   | 0,18      | 3,92    |
| 31,11      | 18,1    | 29,78     | 130,73    | 6889,18   | 144,63   | 0,39      | 4,63    |
| 31,11      | 15,68   | 8,67      | 150,89    | 299,68    | 633,61   | 0,03      | 3,2     |
| 59,89      | 7,74    | 135,73    | 22,51     | 3016,33   | 1584,48  | 0,68      | 12,25   |
| 51,71      | 6,6     | 88,91     | 16,54     | 2168,5    | 477,6    | 0,37      | 4,24    |
| 42,47      | 25,21   | 8,67      | 123,53    | 778,3     | 318,59   | 0,5       | 10,46   |
| 25,75      | 10,3    | 8,67      | 8,3       | 32,77     | 8,59     | 0,06      | 0,09    |
| 22,4       | 11,56   | 8,67      | 74,83     | 32,77     | 1082,24  | 0,18      | 4,63    |
| 63,26      | 15,2    | 144,05    | 40,93     | 118,87    | 78,51    | 0,49      | 3,25    |
| 25,75      | 9,88    | 8,67      | 42,51     | 32,77     | 4413,31  | 0,03      | 12,12   |
| 42,47      | 11,56   | 8,67      | 32,84     | 350,57    | 1354,6   | 0,18      | 5,34    |
| 68,57      | 38,62   | 75,35     | 199,37    | 6935,84   | 1521,88  | 1,59      | 29,02   |
| 22,4       | 15,68   | 8,67      | 57,94     | 371,38    | 287,77   | 0,18      | 0,93    |
| 25,75      | 12,39   | 8,67      | 21,85     | 0,59      | 1346,97  | 0,03      | 5,69    |
| 50,75      | 27,54   | 8,67      | 227,3     | 13506,91  | 10128,99 | 0,91      | 40,98   |
| 39,17      | 13,63   | 29,78     | 55,95     | 52,06     | 10417,89 | 0,29      | 29,33   |
| 51,71      | 8,32    | 106,86    | 9,39      | 24,88     | 602,04   | 0,37      | 3,58    |
| 55,39      | 23,65   | 46,59     | 183,9     | 15604,34  | 5584,8   | 1,2       | 29,64   |
| 25,75      | 9,88    | 8,67      | 129,32    | 32,77     | 2999,53  | 0,18      | 8,78    |
| 42,54      | 6,18    | 101,23    | 11,3      | 8,99      | 86,83    | 0,27      | 0,79    |
| 45,46      | 35,21   | 8,67      | 258,57    | 53889,73  | 313,68   | 0,71      | 11,12   |
| 9,095      | 9,02    | 8,67      | 62,24     | 481,14    | 195,66   | 0,03      | 1,71    |
| 18,19      | 9,02    | 8,67      | 27,04     | 268,78    | 12,3     | 0,06      | 0,93    |
| 25,75      | 11,56   | 8,67      | 19,83     | 120,5     | 1602,93  | 0,39      | 7,42    |
| 55,39      | 49,85   | 46,59     | 585,52    | 6938,07   | 3903,45  | 1,59      | 24,96   |
| 62,62      | 13,06   | 126,85    | 126,47    | 94,39     | 3376,45  | 0,52      | 18,14   |
| 18,19      | 24,43   | 8,67      | 144,17    | 9575,15   | 1174,96  | 0,39      | 5,34    |
| 59,89      | 9,48    | 126,85    | 17,2      | 1157,47   | 329,08   | 0,42      | 2,61    |
| 66,32      | 14,13   | 139,95    | 151,59    | 159970,94 | 586,12   | 0,87      | 8,06    |
| 78,2       | 33,15   | 151,92    | 273,11    | 3582,07   | 8088,02  | 1,29      | 35,23   |
| 49,5       | 39      | 29,78     | 699,72    | 19340,32  | 11105,61 | 1,01      | 44,01   |
| 72,72      | 15,82   | 153,82    | 69,4      | 170,47    | 983,34   | 0,79      | 7,34    |
| 25,75      | 9,88    | 8,67      | 11,47     | 32,77     | 116,35   | 0,03      | 0,52    |
| 53,14      | 39      | 29,78     | 377,39    | 2167,89   | 1968,56  | 0,81      | 17,01   |

| SCGF_b_CVL | SDF_1a_CVL | TNF_b_CVL | TRAIL_CVL | IL_1b_SC | IL_1ra_SC | IL_2_SC | IL_4_SC |
|------------|------------|-----------|-----------|----------|-----------|---------|---------|
| 19,805     | 39,15      | 0,75      | 4,9       |          |           |         |         |
| 19,805     | 87,72      | 1,55      | 44,54     |          |           |         |         |
| 19,805     | 81,62      | 1,15      | 40,54     |          |           |         |         |
| 19,805     | 47,28      | 0,54      | 6,05      |          |           |         |         |
| 19,805     | 39,15      | 0,75      | 16,96     | 515,08   | 14406,29  | 15,01   | 0,78    |
| 19,805     | 81,62      | 2,92      | 15,9      |          |           |         |         |
| 19,805     | 68,8       | 0,54      | 9,41      | 140,58   | 45358,95  | 4,05    | 0,67    |
| 19,805     | 572,01     | 2,14      | 40,38     | 334,55   | 24863,25  | 4,63    | 1,25    |
| 19,805     | 417,06     | 1,44      | 5,08      | 530,77   | 1531,19   | 1,22    | 1,84    |
| 19,805     | 93,64      | 1,15      | 54,44     | 2486,98  | 22096,36  | 16,57   | 6,87    |
| 19,805     | 39,15      | 0,54      | 7,18      |          |           |         |         |
| 19,805     | 54,85      | 0,54      | 11,6      | 595,57   | 24273,38  | 6,16    | 0,78    |
| 19,805     | 417,06     | 2,76      | 18,73     | 8,31     | 31,58     | 0,79    | 1,55    |
| 19,805     | 39,15      | 0,54      | 2,53      |          |           |         |         |
| 19,805     | 115,9      | 1,95      | 20,12     |          |           |         |         |
| 19,805     | 178,57     | 2,53      | 144,65    | 2665,84  | 33497,01  | 11,66   | 1,85    |
| 19,805     | 19,91      | 1,45      | 18,01     |          |           |         |         |
| 19,805     | 224,92     | 0,54      | 3,73      | 1754,89  | 41324,26  | 16,87   | 1,51    |
| 19,805     | 397,53     | 1,55      | 120,98    |          |           |         |         |
| 19,805     | 81,62      | 1,65      | 20,12     |          |           |         |         |
| 19,805     | 235,99     | 2,34      | 2         | 2240,57  | 33384,17  | 13,25   | 2,72    |
| 779,34     | 425,68     | 1,55      | 223,48    |          |           |         |         |
|            |            |           |           | 393,88   | 18419,01  | 2,05    | 1,29    |
| 19,805     | 54,85      | 0,75      | 4,9       |          |           |         |         |
| 19,805     | 340,92     | 1,94      | 0,17      | 1140,7   | 1594,32   | 18,18   | 3,68    |
| 19,805     | 115,9      | 1,75      | 133,31    |          |           |         |         |
| 19,805     | 39,15      | 0,11      | 9,41      | 75,02    | 41647,82  | 4,23    | 0,91    |
| 19,805     | 54,85      | 0,54      | 9,41      |          |           |         |         |
| 19,805     | 54,85      | 1,55      | 18,01     |          |           |         |         |
| 19,805     | 178,57     | 5,57      | 452,76    |          |           |         |         |
| 19,805     | 381,19     | 2,34      | 22,94     | 57,68    | 2393,43   | 0,79    | 2,02    |
| 19,805     | 105,02     | 1,15      | 95,21     |          |           |         |         |
| 19,805     | 433,74     | 3,02      | 6,15      | 1,66     | 895,11    | 1       | 1,03    |
| 19,805     | 629,02     | 4,04      | 28,45     | 72,36    | 846,96    | 2,05    | 1,66    |
| 19,805     | 521,56     | 2,81      | 218,7     | 2832,91  | 2881,03   | 15,59   | 3,11    |
| 19,805     | 182,98     | 2,34      | 239,36    |          |           |         |         |
| 19,805     | 433,74     | 3,07      | 34,68     | 48,85    | 33680,26  | 5,81    | 1,62    |
| 19,805     | 54,85      | 1,15      | 11,6      | 18,13    | 33250,8   | 3,86    | 0,57    |
| 19,805     | 136,46     | 0,95      | 124,77    |          |           |         |         |

IL\_5\_SC IL\_6\_SC IL\_7\_SC IL\_8\_SC IL\_9\_SC IL\_10\_SC IL\_12p70\_SC IL\_13\_SC IL\_15\_SC

|      |        |       |          |       |       |        |       |        |
|------|--------|-------|----------|-------|-------|--------|-------|--------|
| 3,52 | 11,91  | 11,08 | 614,62   | 6,34  | 23,98 | 87,71  | 2,38  | 10,39  |
| 6,13 | 15,1   | 6,99  | 533,8    | 9,91  | 33,49 | 138,86 | 1,84  | 7,78   |
| 0,38 | 67,25  | 3,69  | 6797,79  | 9,91  | 19,01 | 129,62 | 6,49  | 1,41   |
| 0,45 | 5,29   | 1,92  | 2547,66  | 3,73  | 2,39  | 16,72  | 2,68  | 0,3    |
| 4,6  | 8,08   | 13,3  | 2100,52  | 11,37 | 49,17 | 130,18 | 6,37  | 0,0001 |
| 2,81 | 5,1    | 7,85  | 768,51   | 13,04 | 31,64 | 114,27 | 2,7   | 0,0001 |
| 0,1  | 0,58   | 1,06  | 21,65    | 1,94  | 3,32  | 31,64  | 2,98  | 0,76   |
| 7,96 | 77,17  | 13,44 | 966,48   | 12,96 | 37,63 | 175,04 | 4,33  | 0,0001 |
| 1,21 | 10,26  | 13,82 | 12123,32 | 25,3  | 33,15 | 192,2  | 3,06  | 14,27  |
| 0,74 | 51,7   | 7,71  | 57063,94 | 10,01 | 23,77 | 271,88 | 15,73 | 3,36   |
| 1,3  | 32,03  | 5,04  | 7947,07  | 3,77  | 5,59  | 41,89  | 7,63  | 1,02   |
| 0,51 | 568,26 | 3,1   | 963,92   | 7,3   | 16,65 | 22,83  | 4,49  | 2,64   |
| 5,2  | 44,37  | 14,85 | 815,87   | 10,05 | 31,39 | 115,15 | 3,06  | 0,0001 |
| 0,31 | 14,78  | 2,02  | 172,43   | 3,42  | 2,93  | 15,74  | 1,85  | 0,5    |
| 0,17 | 0,65   | 1,16  | 22,51    | 1,84  | 2,55  | 10,88  | 1,29  | 1,46   |
| 0,35 | 33,77  | 3,98  | 1156,8   | 2,44  | 2,23  | 14,77  | 1,85  | 1,51   |
| 0,63 | 711,61 | 4,51  | 12398,08 | 5,09  | 10,21 | 68,57  | 8,94  | 3,13   |
| 0,31 | 48,86  | 6,47  | 31084,45 | 6,78  | 9,55  | 120,39 | 8,39  | 5      |
| 0,56 | 4,21   | 3,1   | 283,25   | 7,73  | 27,54 | 89,95  | 1,27  | 18,74  |

| IL_17_SC | Eotaxin_SC | FGFbasic_SC | G-CSF_SC | GM-CSF_SC | IFN_g_SC | IP_10_SC  | MCP_1_SC |
|----------|------------|-------------|----------|-----------|----------|-----------|----------|
| 39,55    | 5,43       | 25,51       | 2741,51  | 107,85    | 40,14    | 32,83     | 22,22    |
| 31,82    | 0,205      | 19,42       | 3907,45  | 105,96    | 26,03    | 441,54    | 37,61    |
| 50,72    | 30,79      | 12,38       | 1225,4   | 17,2      | 67,62    | 5874,39   | 46,82    |
| 74,47    | 17,45      | 43,62       | 99,68    | 28,87     | 86,57    | 2908,2    | 30,57    |
| 85,22    | 25,49      | 52,44       | 787,43   | 134,2     | 297,58   | 2063,88   | 38,66    |
| 53,49    | 0,205      | 39,77       | 459,87   | 130       | 36,96    | 312,42    | 13,83    |
| 136,65   | 14,81      | 59,18       | 12,09    | 28,87     | 32,16    | 41,74     | 3,74     |
| 174,26   | 11,83      | 32,43       | 10767,05 | 118,24    | 188,63   | 1036,45   | 74,11    |
| 686,04   | 17,02      | 37,26       | 1839,06  | 93,48     | 84,66    | 169509,46 | 102,64   |
| 28,03    | 54,94      | 24,29       | 3678,4   | 39,4      | 176,66   | 16912,99  | 23,74    |
| 6,22     | 17,01      | 13,99       | 795,39   | 31,1      | 72,82    | 1530,32   | 99,9     |
| 176,12   | 37,53      | 68,84       | 13655,98 | 32,66     | 209,2    | 118,95    | 62,89    |
| 56,41    | 2,62       | 27,4        | 2649,34  | 119,87    | 44,84    | 440,78    | 129,56   |
| 114,35   | 21,8       | 57,34       | 222,87   | 26,65     | 53,62    | 45,63     | 4,79     |
| 82,98    | 17,45      | 36,71       | 20,5     | 36,48     | 37,6     | 1342,47   | 4,12     |
| 102,42   | 21,37      | 39,2        | 2128,11  | 28,2      | 65,88    | 107,86    | 142,67   |
| 51,49    | 47,11      | 41,2        | 7399,55  | 23,55     | 627,32   | 10423,22  | 49,61    |
| 62,13    | 37,53      | 19,32       | 1088,25  | 38,28     | 98,5     | 68702,05  | 129,67   |
| 34,41    | 0,205      | 24,06       | 280,36   | 143,04    | 22,63    | 27258,37  | 38,83    |

| MIP_1a_SC | PDGF_bb_SC | MIP_1b_SC | RANTES_SC | TNF_a_SC | VEGF_SC  | IL_1a_SC | IL_2Ra_SC |
|-----------|------------|-----------|-----------|----------|----------|----------|-----------|
| 4,07      | 84,3       | 7,95      | 12,24     | 23,9     | 1009,76  | 840,89   | 78,25     |
| 1,89      | 28,53      | 7,35      | 7,7       | 17,35    | 3244,44  | 1089,09  | 60,49     |
| 1,67      | 33,89      | 384,8     | 22,31     | 63,34    | 3578,2   | 235,75   | 182,04    |
| 1,48      | 46,45      | 17,12     | 5,18      | 28,61    | 597,7    | 156,95   | 97,22     |
| 4,59      | 79,66      | 55,92     | 13,77     | 140,64   | 3625,13  | 6408,85  | 76,31     |
| 4,19      | 32,79      | 9,11      | 13,52     | 28,8     | 2151,27  | 276,72   | 41,72     |
| 1,45      | 5,88       | 4,66      | 4,34      | 7,15     | 916,08   | 193,51   | 38,54     |
| 4,98      | 61,22      | 37,34     | 51,79     | 86,61    | 6681,34  | 1373,28  | 150,54    |
| 4,11      | 132,52     | 55,92     | 90,42     | 35,59    | 8632,1   | 892,1    | 84        |
| 2,8       | 42,71      | 68,26     | 40,51     | 150,92   | 17203,15 | 838,71   | 133,64    |
| 0,89      | 32,37      | 10,56     | 17,29     | 25       | 706,95   | 266,26   | 75,63     |
| 5,91      | 28,66      | 365,93    | 7,29      | 1043,29  | 689,32   | 192,64   | 44,37     |
| 2,02      | 81,21      | 10,21     | 11,15     | 20,9     | 1255,56  | 1000,45  | 102,7     |
| 1,46      | 9,48       | 17,47     | 4,03      | 15,59    | 338,47   | 100,4    | 38,54     |
| 1,42      | 35,92      | 3,37      | 5,08      | 5,59     | 600,23   | 227,85   | 34,65     |
| 1,58      | 70,24      | 10,56     | 3,42      | 26,58    | 423,86   | 421,78   | 91,33     |
| 2,5       | 42,54      | 12,14     | 16,57     | 336,23   | 2458,47  | 1948,31  | 239,53    |
| 0,95      | 80,39      | 22,53     | 93,15     | 11,18    | 2885,86  | 152,94   | 95,25     |
| 0,94      | 47,35      | 5,07      | 14,25     | 8        | 1231,82  | 162,23   | 68,48     |

IL\_3\_SC IL\_12p40\_SC IL\_16\_SC IL\_18\_SC CTACK\_SC GROa\_SC HGF\_SC IFN\_a2\_SC LIF\_SC

|        |        |        |          |       |         |         |        |        |
|--------|--------|--------|----------|-------|---------|---------|--------|--------|
| 111,47 | 210,85 | 49,79  | 1996,36  | 50,87 | 104,83  | 803,53  | 50,75  | 65,68  |
| 90,94  | 123,56 | 52,53  | 406,2    | 36,81 | 173,62  | 614,82  | 39,17  | 49,48  |
| 460,43 | 519,42 | 197,93 | 6301,63  | 62,36 | 592,92  | 3240,88 | 105,44 | 41,86  |
| 219,09 | 176,39 | 99,69  | 1984,98  | 35,38 | 730,64  | 381,28  | 79,05  | 26,35  |
| 148,1  | 194,83 | 80,85  | 2272,96  | 71,09 | 496,56  | 2065,95 | 55,39  | 68,59  |
| 70,68  | 2,825  | 37,76  | 61,79    | 48,29 | 65,27   | 1174,23 | 25,75  | 55,03  |
| 99,11  | 87,5   | 56,13  | 764,26   | 18,8  | 356,9   | 62,19   | 61,28  | 21,17  |
| 216,17 | 627,7  | 136    | 14947,76 | 89,71 | 170,28  | 3369,06 | 82,31  | 118,25 |
| 187,89 | 566,66 | 87,06  | 1322,95  | 62,65 | 1781,41 | 1013,83 | 59,56  | 30,63  |
| 451,44 | 397,81 | 149,73 | 3056,31  | 61,42 | 666,29  | 784,88  | 104,18 | 50,43  |
| 223,67 | 186,78 | 110,48 | 3726,56  | 33,68 | 398,65  | 668,66  | 81,49  | 42,89  |
| 101,78 | 67,37  | 70,2   | 276,19   | 18,8  | 407,01  | 1986,05 | 65,13  | 33,83  |
| 164,9  | 587,3  | 95,95  | 3328,36  | 71,09 | 645,95  | 675,97  | 65,16  | 42,01  |
| 99,11  | 80,77  | 47,13  | 236,32   | 14,52 | 314,35  | 353,86  | 58,43  | 8,03   |
| 81,43  | 95,95  | 56,13  | 15,27    | 11,43 | 362,11  | 47,26   | 58,43  | 8,03   |
| 186,49 | 166,03 | 85,99  | 3172,14  | 38,16 | 464,72  | 1469,4  | 80,69  | 43,59  |
| 402,94 | 358,73 | 189    | 1966,99  | 67,47 | 848,61  | 8597,06 | 100,24 | 105,69 |
| 269,64 | 235,48 | 116,32 | 1834,47  | 43,53 | 765,51  | 891,29  | 86,71  | 25,53  |
| 142,3  | 423,71 | 62,77  | 742,24   | 53,37 | 1495,7  | 68,82   | 49,5   | 20,49  |

| MCP_3_SC | M_CSF_SC | MIF_SC  | MIG_SC   | b_NGF_SC | SCF_SC | SCGF_b_SC | SDF_1a_SC |
|----------|----------|---------|----------|----------|--------|-----------|-----------|
| 38,93    | 839,72   | 120,5   | 635,92   | 1,01     | 11,46  | 19,81     | 131,45    |
| 59,46    | 1045,66  | 5255,88 | 4685,03  | 0,6      | 17,98  | 19,81     | 105,02    |
| 206,88   | 278,38   | 6013,94 | 85445,96 | 3,17     | 103,44 | 4393,46   | 817,11    |
| 166,52   | 187,97   | 5566,13 | 5808,14  | 1,41     | 38,77  | 19,81     | 583,89    |
| 29,78    | 1347,31  | 1055,17 | 4859,76  | 2,15     | 22,44  | 68,1      | 174,11    |
| 8,67     | 337,59   | 108,65  | 3936,54  | 0,03     | 11,46  | 19,81     | 87,72     |
| 124,53   | 297,72   | 886,22  | 64,34    | 0,57     | 2,61   | 19,81     | 508,09    |
| 122,1    | 1717,55  | 354,08  | 7015     | 3,97     | 51,82  | 19,81     | 310,96    |
| 97,06    | 1193,38  | 2062,39 | 41974,7  | 1,59     | 137,93 | 19,81     | 260       |
| 224,31   | 280,6    | 5307,89 | 85445,96 | 3,01     | 108,3  | 1356,08   | 756,68    |
| 159,39   | 187,49   | 2286,09 | 2823,73  | 1,27     | 22,65  | 39,61     | 559,86    |
| 95,27    | 392,32   | 1192,46 | 3818,81  | 0,68     | 15,07  | 19,81     | 508,09    |
| 80,07    | 806,95   | 8681,86 | 2450,81  | 1,59     | 27,46  | 19,81     | 182,98    |
| 101,23   | 96,88    | 158,96  | 2076,81  | 0,37     | 8,06   | 19,81     | 340,92    |
| 126,85   | 574,97   | 37,95   | 3887,6   | 0,37     | 16,99  | 19,81     | 340,92    |
| 131,36   | 997,78   | 4578,02 | 4174,02  | 1,74     | 22,06  | 4785,98   | 629,02    |
| 213,76   | 776,75   | 977,48  | 85445,96 | 2,63     | 119,26 | 2377,08   | 833,59    |
| 166,52   | 431,24   | 2028,95 | 10501,06 | 1,59     | 55,39  | 19,81     | 606,9     |
| 88,89    | 585,66   | 1601,91 | 19683,45 | 1,01     | 73,38  | 19,81     | 165,05    |

TNF\_b\_SC TRAIL\_SC

3,68 60,34

3,3 72,05

4,81 235,75

3,5 178,42

6,32 281,31

2,43 46,53

2,24 27,22

5,94 435,03

4,25 116,22

4,81 465,58

2,19 148,89

1,25 48,73

2,72 125,72

1,84 12,29

2,14 15,19

3,5 67,14

6,4 321,75

3,28 77,87

4,06 56,41
